# Supplementary material for: Improves symptoms and urinary biomarkers in refractory interstitial cystitis/bladder pain syndrome patients randomized to extracorporeal shock wave therapy versus placebo
Source: PubMed Central journal article supplement (PMC8024394; doi:10.1038/s41598-021-87040-1), 2021-04-06
Supplement: 41598_2021_87040_MOESM1_ESM.pdf [file 41598_2021_87040_MOESM1_ESM.pdf]

Improves Symptoms and **Urinary Biomarkers** in Refractory Interstitial Cystitis/Bladder Pain Syndrome Patients **Randomized to** Extracorporeal shock wave therapy **versus Placebo**

Yuan-Chi Shen<sup>1,2</sup>, Pradeep Tyagi<sup>3</sup>, Wei-Chia Lee<sup>1,2</sup>, Michael Chancellor<sup>4</sup>, Yao-Chi Chuang<sup>1,2</sup>

Department of Urology <sup>1</sup>, The Center of Excellence in Shockwave Medicine and Tissue Regeneration<sup>2</sup>, Kaohsiung Chang Gung Memorial Hospital, Chang Gung University College of Medicine, Kaohsiung, Taiwan;

Department of Urology<sup>3</sup>, University of Pittsburgh, School of Medicine, Pittsburgh, Pennsylvania

Department of Urology<sup>4</sup>, Beaumont Health System, Oakland University William Beaumont School of Medicine, Royal Oak, MI

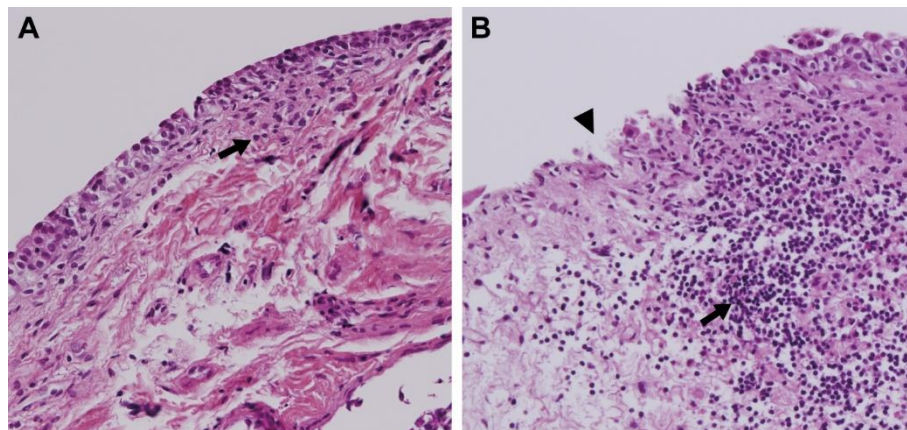

A. mild lymphocytic infiltration (arrow)

B. moderate lymphocytic infiltration (arrow) associated with mucosal denuding (arrowhead)
